# Supplementary material for: Comparative transcriptomics of the garden dormouse hypothalamus during hibernation
Source: PubMed Central journal article supplement (PMC10839406; doi:10.1002/2211-5463.13731), 2023-12-18
Supplement: FEB4-14-241-s001.pdf [file FEB4-14-241-s001.pdf]

A

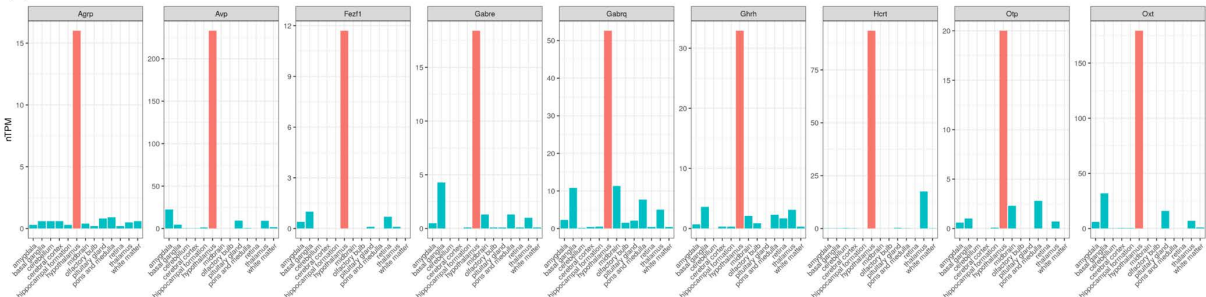

B

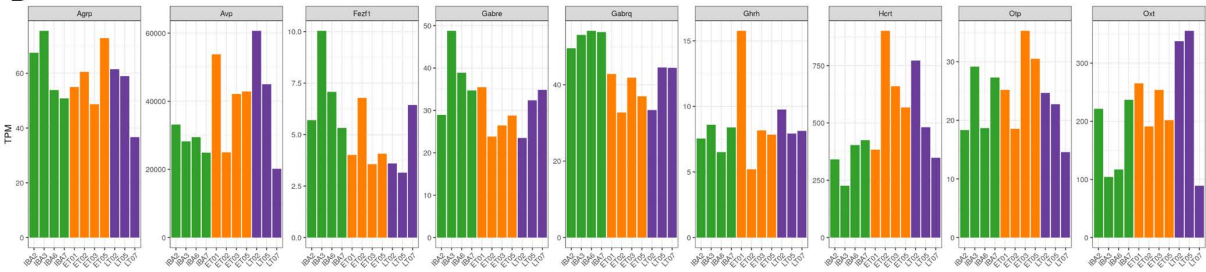

Suppl. Figure 2: Hypothalamus specific gene expression. A. Normalized mouse expression data from the Human Protein Atlas for 13 brain regions in the mouse of 9 hypothalamus specific genes. B. The same 9 hypothalamus specific genes in all individual dormouse samples.
