# Supplementary material for: Comparative transcriptomics of the garden dormouse hypothalamus during hibernation
Source: PubMed Central journal article supplement (PMC10839406; doi:10.1002/2211-5463.13731), 2023-12-18
Supplement: FEB4-14-241-s005.pdf [file FEB4-14-241-s005.pdf]

## *Supplementary File 1*

**Supplementary Table 1: Background informations of animals.** All eleven animals were adults kept at constant darkness without food and water at 5 °C to enable hibernation. Each animal is identified by the sampling group and a running number. The sex is given for females (f) and males (m). The duration is defined for torpor as time between Tb < 18 °C and sacrifice, and for IBA as time between Tb > 18 °C and sacrifice. Mean value with standard deviation of the mean (Std. Dev.) is given for each animal and group as early torpor (ET), late torpor (LT), torpor (ET+LT), interbout arousal (IBA). The hypothalamic sample of dormouse LT01 (sex: female, terminal Tb: 4.09 °C, terminal body mass: 77.4 g, sacrificed on 09.02.2015 in late torpor after 222.9 hours with Tb < 18 °C) was excluded from the analyses due to an undetectable RIN.

| group         | animal ID | sex | terminal Tb [°C] | terminal body mass [g] | date of sacrifice | duration [hours] |
|---------------|-----------|-----|------------------|------------------------|-------------------|------------------|
| ET            | ET01      | m   | 5.31             | 86.4                   | 24.02.2015        | 25.0             |
|               | ET02      | f   | 4.24             | 84.0                   | 03.02.2015        | 40.6             |
|               | ET03      | m   | 5.08             | 92.7                   | 04.02.2015        | 40.9             |
|               | ET05      | m   | 4.40             | 87.9                   | 04.02.2015        | 38.9             |
| LT            | LT02      | m   | 5.54             | 116.7                  | 03.02.2015        | 229.2            |
|               | LT05      | m   | 5.14             | 98.1                   | 13.02.2015        | 227.6            |
|               | LT07      | f   | 4.62             | 95.6                   | 12.02.2015        | 234.0            |
| IBA           | IBA2      | f   | 37.03            | 74.5                   | 22.03.2015        | -                |
|               | IBA3      | f   | 37.02            | 87.6                   | 22.03.2015        | 3.1              |
|               | IBA6      | m   | 36.86            | 90.9                   | 19.02.2015        | 2.4              |
|               | IBA7      | f   | 36.17            | 86.0                   | 05.03.2015        | 5.8              |
| ET (n = 4)    | mean      | -   | 4.8              | 87.8                   | -                 | 36.3             |
|               | Std. Dev. | -   | 0.5              | 3.7                    | -                 | 7.6              |
| LT (n = 3)    | mean      | -   | 5.1              | 103.5                  | -                 | 230.3            |
|               | Std. Dev. | -   | 0.5              | 11.5                   | -                 | 3.3              |
| ET+LT (n = 7) | mean      |     | 4.9              | 94.5                   | -                 | -                |
|               | Std. Dev. |     | 0.5              | 11.0                   | -                 | -                |
| IBA (n = 4)   | mean      | -   | 36.8             | 84.8                   | -                 | 3.7              |
|               | Std. Dev. | -   | 0.4              | 7.1                    | -                 | 1.8              |
| all (n = 11)  | mean      | -   | -                | 90.9                   | -                 | -                |
|               | Std. Dev. | -   | -                | 10.6                   | -                 | -                |

Supplementary Material

**Supplementary Table 2: Number of read pairs.** Each animal is identified by the sampling group (early torpor – ET, late torpor – LT, interbout arousal – IBA) and a running number. mRNA-Seq was conducted on an Illumina NextSeq 500 (paired end, 4 lanes L001 to L004). The hypothalamic sample of dormouse LT01 was excluded from the analyses due to an undetectable RIN.

|         | group | sample ID | read pairs |           |           |           |                    |            |
|---------|-------|-----------|------------|-----------|-----------|-----------|--------------------|------------|
|         |       |           | L001       | L002      | L003      | L004      | average            | sum        |
|         | ET    | ET01      | 8,616,141  | 8,534,720 | 8,752,618 | 8,515,629 | 8,604,777          | 34,419,108 |
|         |       | ET02      | 7,278,826  | 7,180,590 | 7,386,325 | 7,147,440 | 7,248,295          | 28,993,181 |
|         |       | ET03      | 9,473,916  | 9,425,198 | 9,614,613 | 9,404,048 | 9,479,444          | 37,917,775 |
|         |       | ET05      | 7,808,047  | 7,719,751 | 7,923,083 | 7,708,887 | 7,789,942          | 31,159,768 |
|         | LT    | LT01      | 9,438,251  | 9,380,250 | 9,590,752 | 9,362,964 | 9,443,054          | 37,772,217 |
|         |       | LT02      | 9,357,318  | 9,255,517 | 9,493,363 | 9,206,111 | 9,328,077          | 37,312,309 |
|         |       | LT05      | 8,598,337  | 8,495,974 | 8,723,407 | 8,484,806 | 8,575,631          | 34,302,524 |
|         |       | LT07      | 8,884,916  | 8,790,218 | 9,014,207 | 8,785,731 | 8,868,768          | 35,475,072 |
|         | IBA   | IBA2      | 6,518,339  | 6,480,531 | 6,635,649 | 6,437,665 | 6,518,046          | 26,072,184 |
|         |       | IBA3      | 6,768,058  | 6,710,868 | 6,869,421 | 6,693,708 | 6,760,514          | 27,042,055 |
|         |       | IBA6      | 8,128,165  | 8,072,995 | 8,261,775 | 8,046,020 | 8,127,239          | 32,508,955 |
|         |       | IBA7      | 8,050,117  | 7,984,719 | 8,173,036 | 7,960,485 | 8,042,089          | 32,168,357 |
|         | min   |           |            |           | 6,437,665 |           | -                  | 26,072,184 |
| average |       |           |            | 8,232,156 |           | 8,232,156 | 32,928,625         |            |
| max     |       |           |            | 9,614,613 |           | -         | 37,917,775         |            |
| sum     |       |           |            | -         |           | -         | <b>395,143,505</b> |            |

**Supplementary Table 3: Background information of lab work.** Volume was orientated on tissue weight. Total RNA was isolated using peqGOLD Trifast™ (Peqlab, Erlangen, Germany) and purified using the Crystal RNA MiniKit (Biolabproducts, Bebensee, Germany) including an on-column digestion with RNase-free DNase (Quiagen, Hilden, Germany). RNA purity was assessed by the 260/280 nm ratio on a NanoDrop 1000 spectrophotometer. RNA integrity was proven by formaldehyde agarose gel electrophoresis. The hypothalamic sample of dormouse LT01 was excluded from the analyses due to an undetectable RIN.

| <b>group</b>        | <b>animal ID</b> | <b>volume [ml]</b> | <b>quantity [µg]</b> | <b>concentration [ng / µl]</b> | <b>quality [RIN]</b> |
|---------------------|------------------|--------------------|----------------------|--------------------------------|----------------------|
| <b>ET</b>           | <b>ET01</b>      | 3                  | 1.22                 | 407                            | 6.2                  |
|                     | <b>ET02</b>      | 3                  | 1.29                 | 429                            | 6.4                  |
|                     | <b>ET03</b>      | 3                  | 1.12                 | 375                            | 6.4                  |
|                     | <b>ET05</b>      | 2                  | 1.32                 | 662                            | 6.3                  |
| <b>LT</b>           | <b>LT02</b>      | 5                  | 1.05                 | 210                            | 6.3                  |
|                     | <b>LT05</b>      | 2                  | 1.18                 | 590                            | 6.5                  |
|                     | <b>LT07</b>      | 2                  | 1.33                 | 667                            | 7.3                  |
| <b>IBA</b>          | <b>IBA2</b>      | 3                  | 1.36                 | 452                            | 6.5                  |
|                     | <b>IBA3</b>      | 3                  | 1.03                 | 345                            | 7.2                  |
|                     | <b>IBA6</b>      | 3                  | 0.99                 | 329                            | 6.7                  |
|                     | <b>IBA7</b>      | 3                  | 1.31                 | 436                            | 6.5                  |
| <b>all (n = 11)</b> | <b>min</b>       | 2                  | 0.99                 | 210                            | 6.2                  |
|                     | <b>max</b>       | 5                  | 1.36                 | 667                            | 7.3                  |
|                     | <b>mean</b>      | 3                  | 1.20                 | 446                            | 6.6                  |
|                     | <b>Std. Dev.</b> | 1                  | 0.13                 | 143                            | 0.4                  |
